# Supplementary material for: Comorbid Analysis of Genes Associated with Autism Spectrum Disorders Reveals Differential Evolutionary Constraints
Source: PubMed Central journal article supplement (PMC4945013; doi:10.1371/journal.pone.0157937), 2016-07-14
Supplement: pone.0157937.s001.pdf [file pone.0157937.s001.pdf]

p-value vs standard error plot

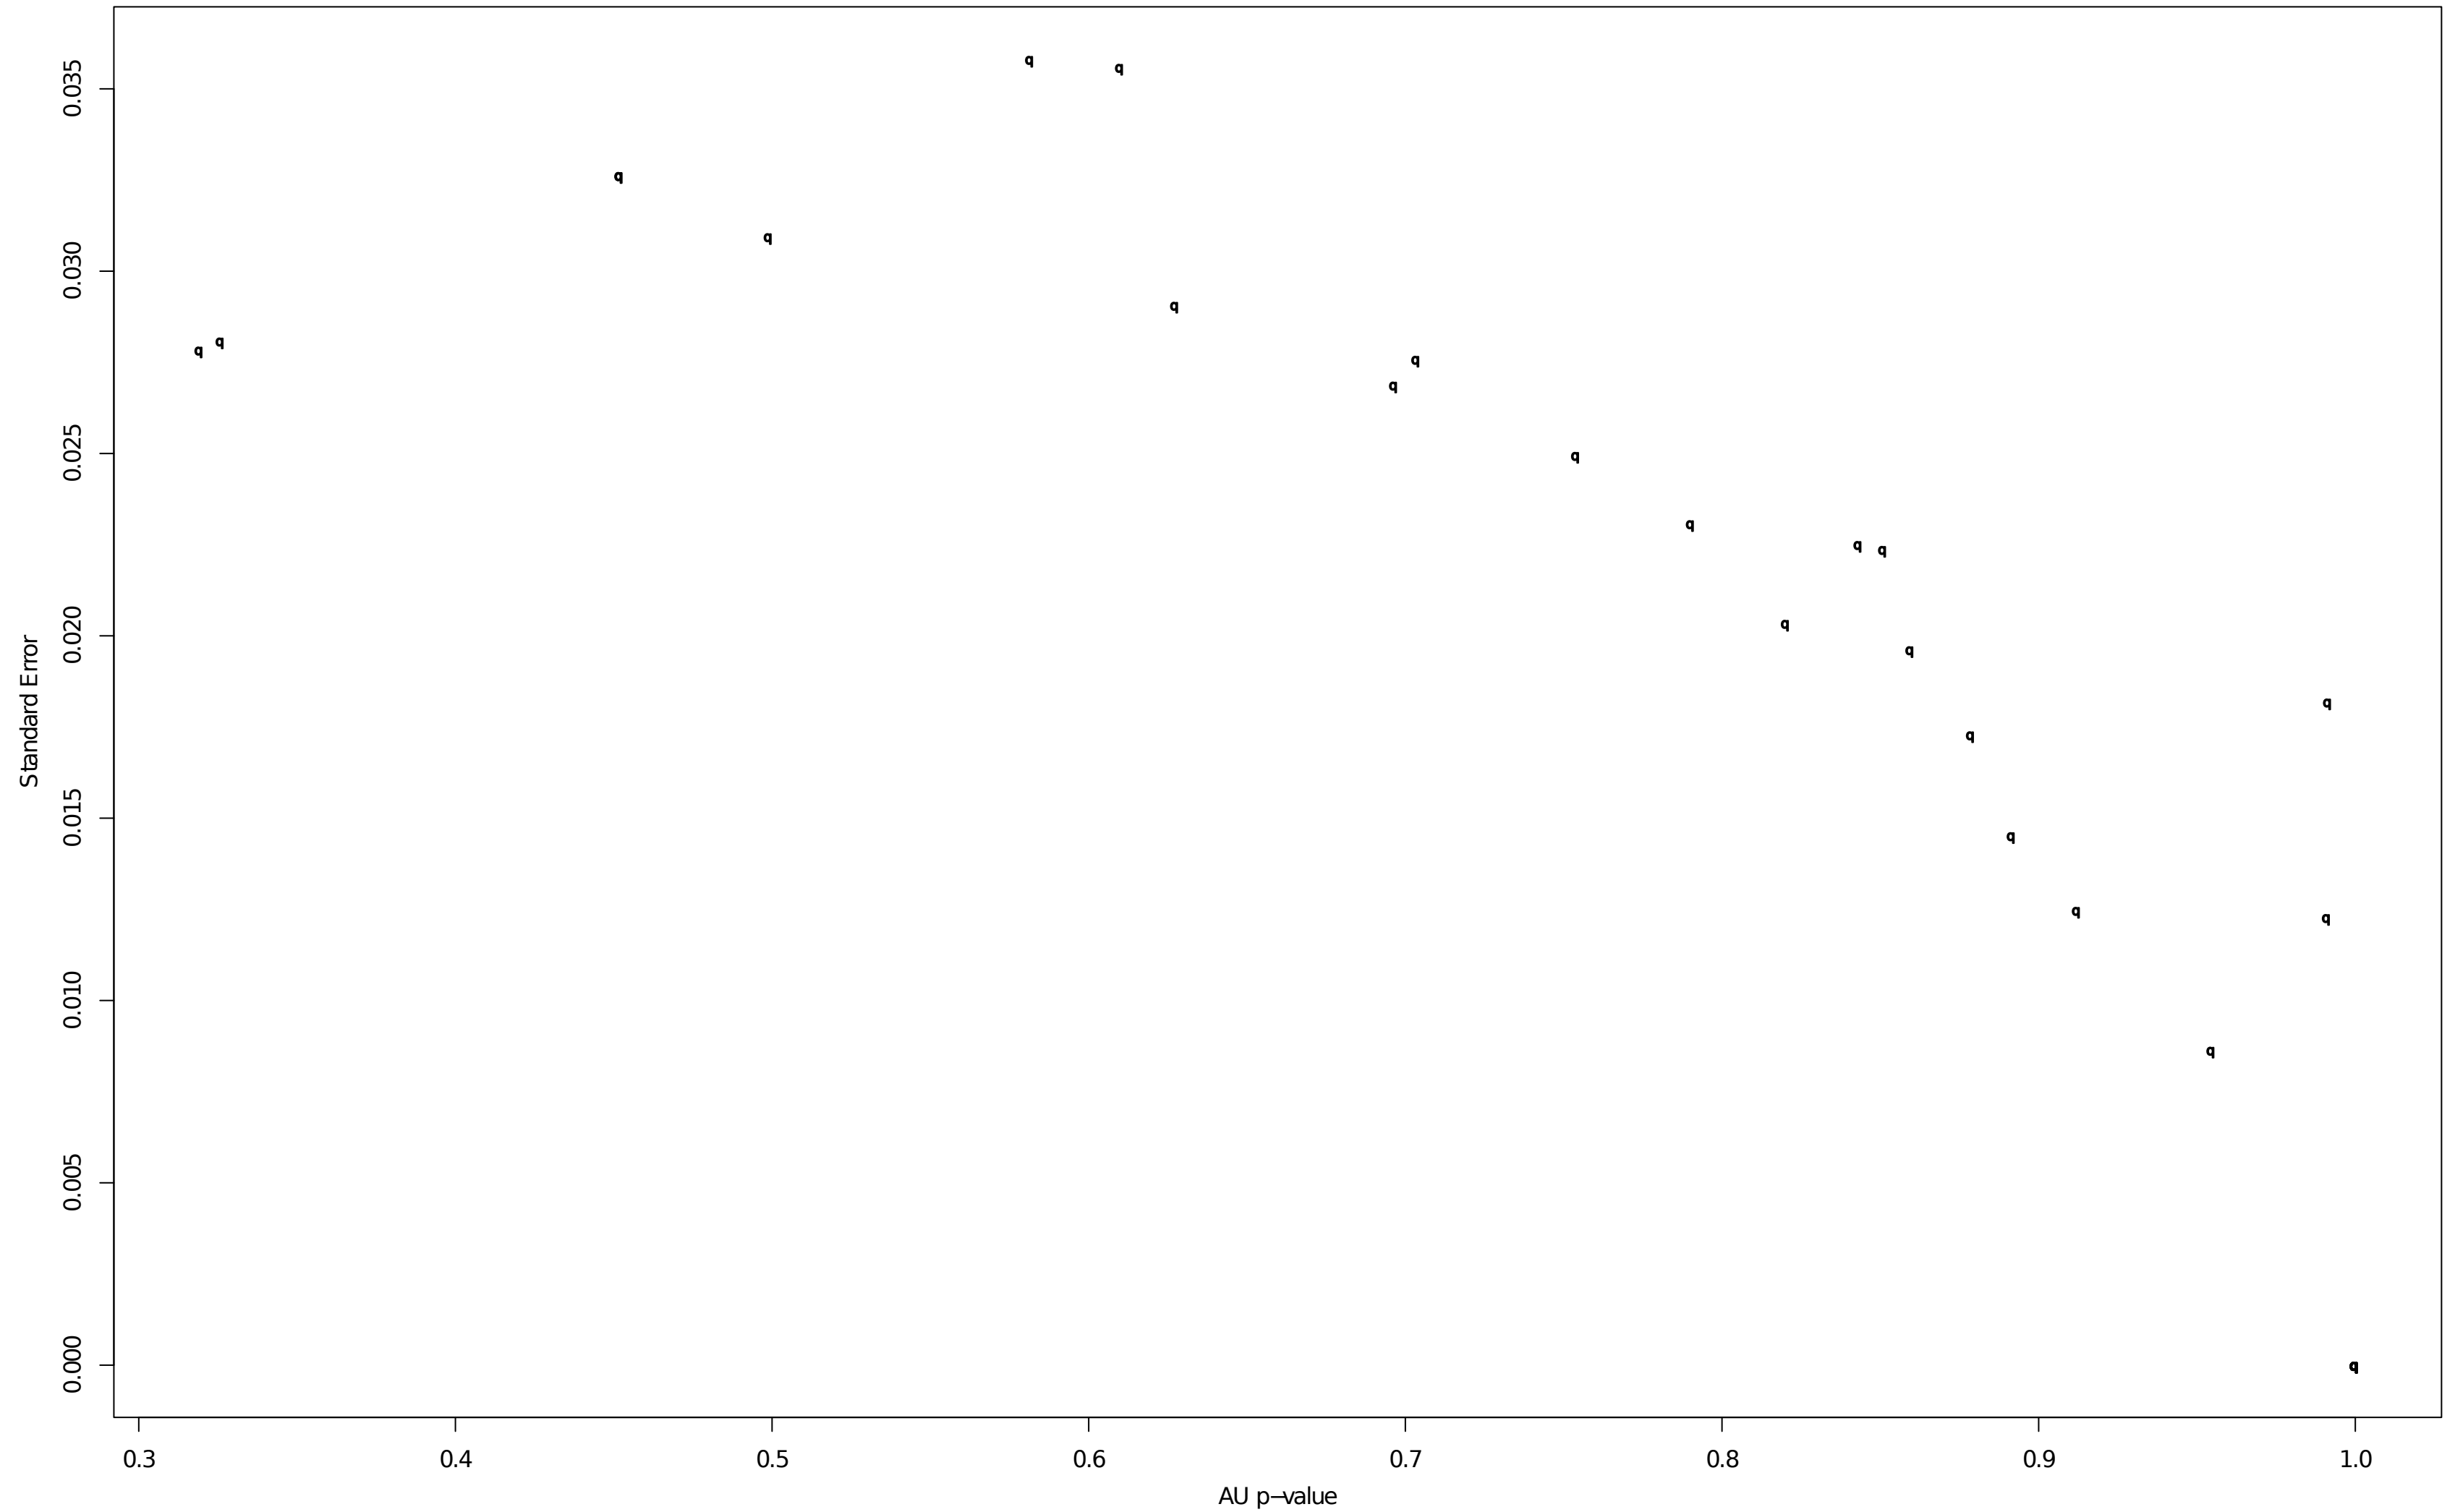

S1 Fig: Standard error of each p-value of multi-scale bootstrap in Fig 1
