# Supplementary material for: Comorbid Analysis of Genes Associated with Autism Spectrum Disorders Reveals Differential Evolutionary Constraints
Source: PubMed Central journal article supplement (PMC4945013; doi:10.1371/journal.pone.0157937), 2016-07-14
Supplement: pone.0157937.s002.pdf [file pone.0157937.s002.pdf]

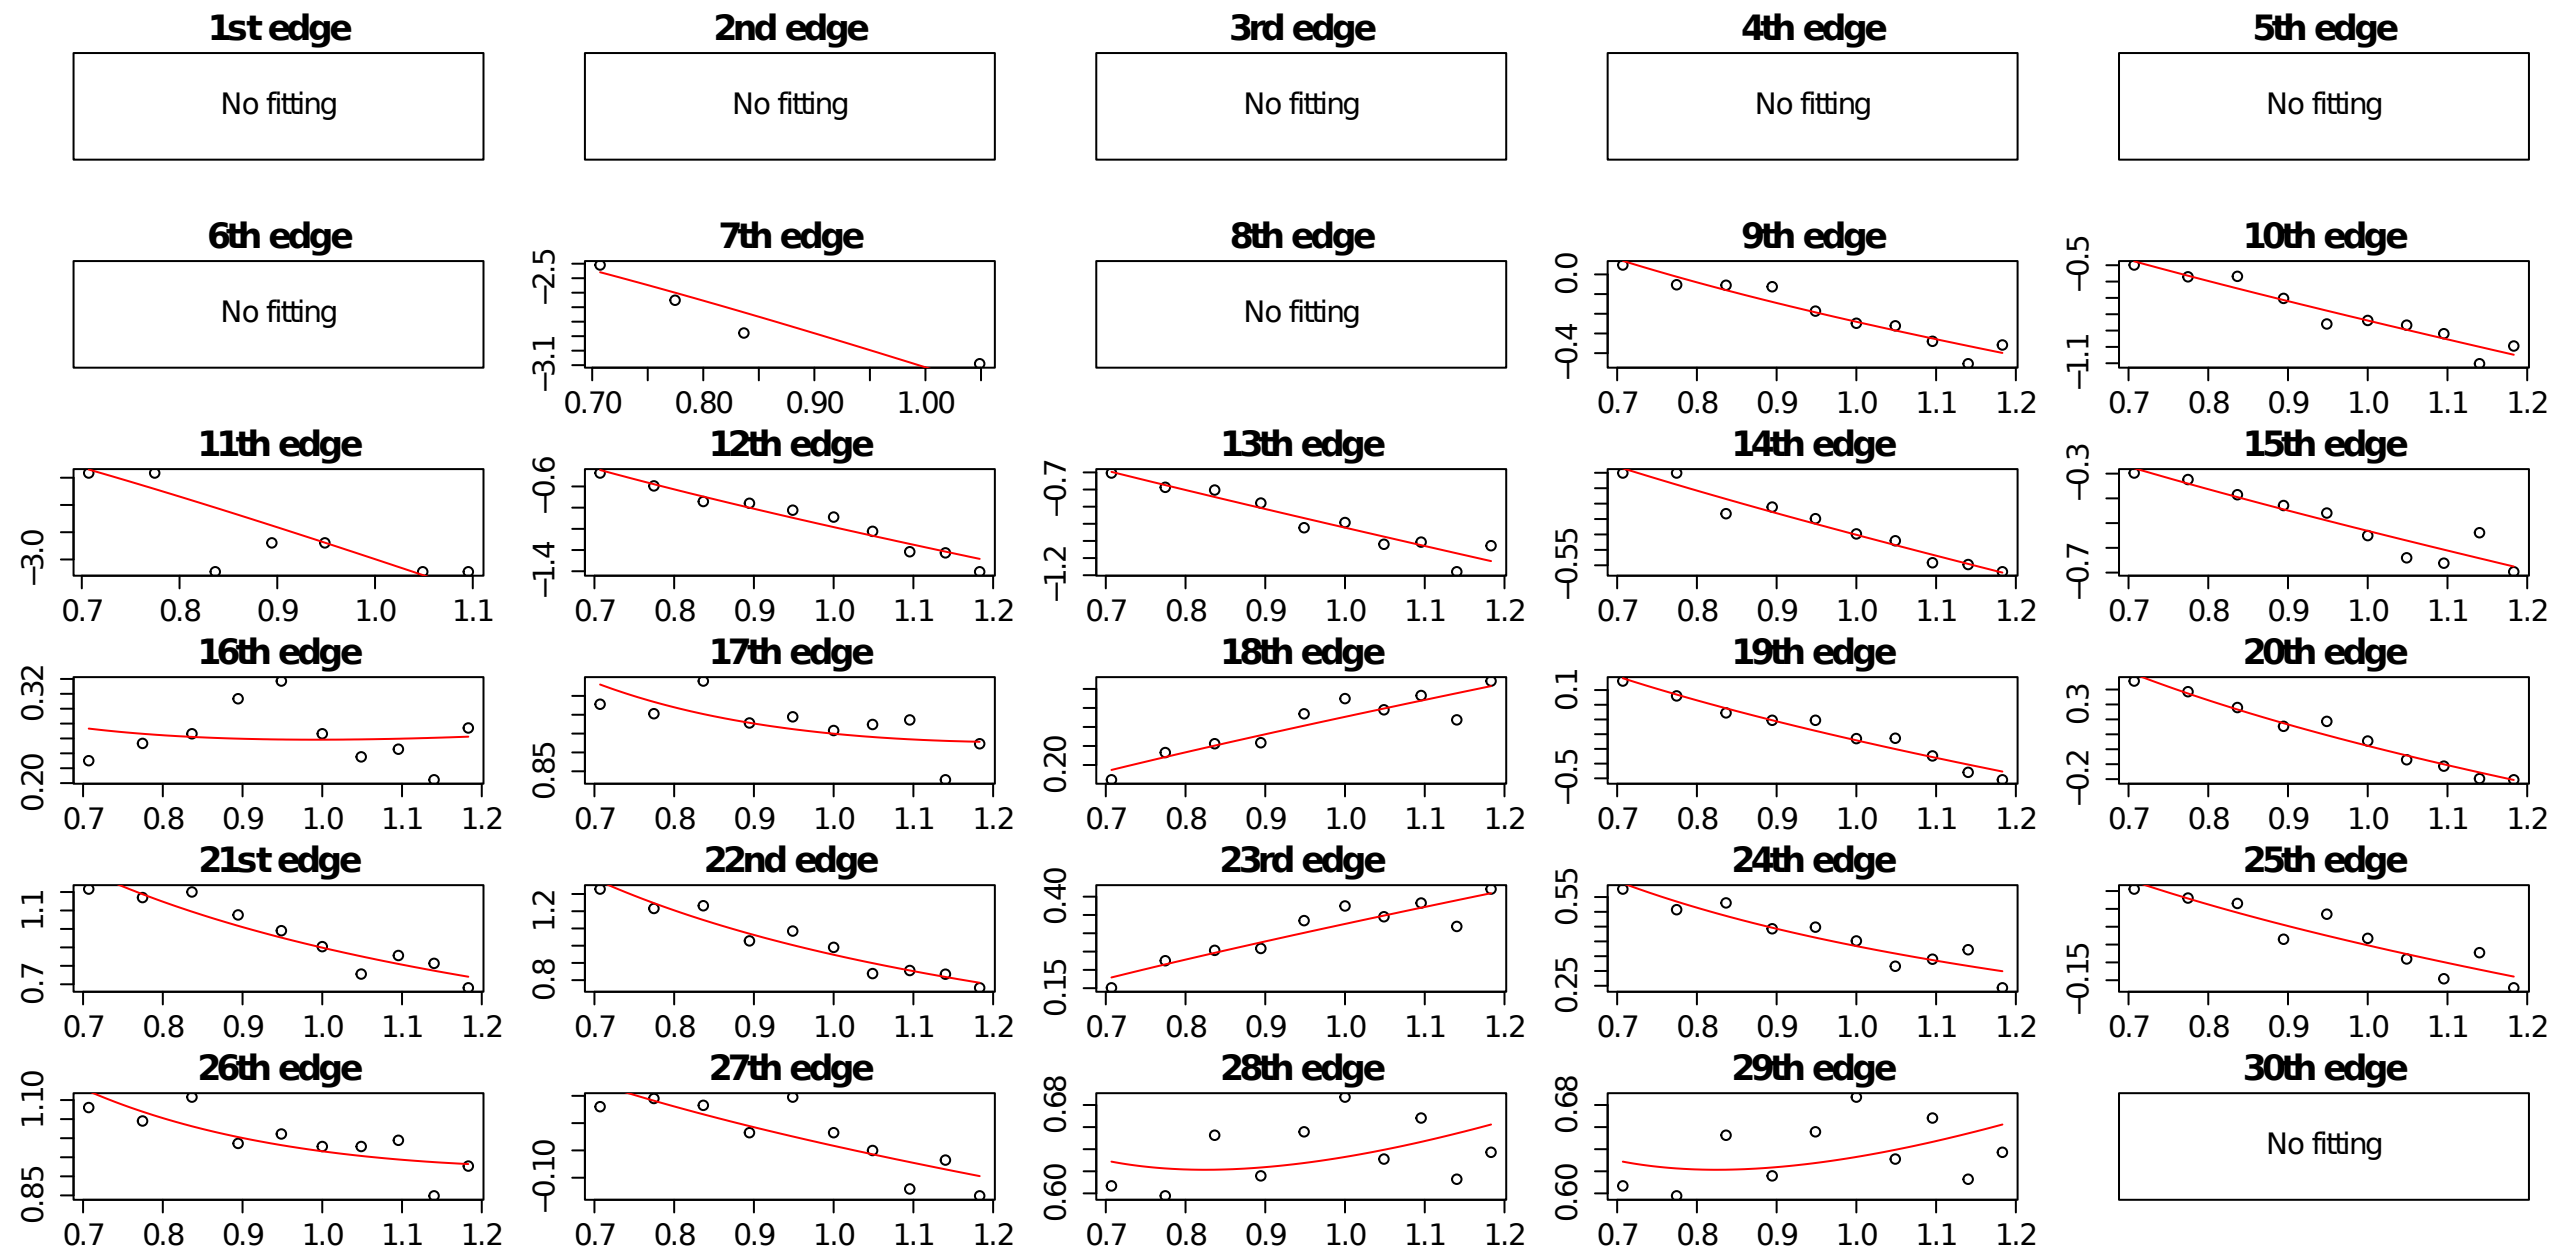

**S2 Fig:** Fitting curve for the multiscale bootstrap performed Figure 1 for each cluster
