# Supplementary material for: Comorbid Analysis of Genes Associated with Autism Spectrum Disorders Reveals Differential Evolutionary Constraints
Source: PLoS One. 2016 Jul 14;11(7):e0157937. doi: 10.1371/journal.pone.0157937 (PMC4945013; doi:10.1371/journal.pone.0157937)
Supplement: S2 Table — (XLSX) [file pone.0157937.s004.xlsx]

## Sheet: Supp_Table_F.csv
S2table: Correspondence between KEGG Orthologs, hsa (KEGG) and Symbol ID.
	ko	hsa	symbol
1	ko:K00669	hsa:15	AANAT
2	ko:K13524	hsa:18	ABAT
3	ko:K05647	hsa:154664	ABCA13
4	ko:K05645	hsa:10347	ABCA7
5	ko:K05664	hsa:8647	ABCB1
6	ko:K04828	hsa:40	ASIC2
7	NA	hsa:135293	ACY1
8	NA	hsa:101930047	ADA
9	ko:K08632	hsa:170692	ADAMTS18
10	ko:K13194	hsa:104	ADARB1
11	ko:K08041	hsa:107	ADCY1
12	ko:K08045	hsa:111	ADCY5
13	ko:K13951	hsa:124	ADH1A
14	ko:K13951	hsa:125	ADH1B
15	ko:K13951	hsa:126	ADH1C
16	ko:K04501	hsa:4089	ADH4
17	ko:K16790	hsa:4090	ADH5
18	ko:K16791	hsa:4093	ADH6
19	ko:K04677	hsa:4092	ADH7
20	ko:K05725	hsa:5747	ADK
21	NA	hsa:101927631	ADNP
22	ko:K04266	hsa:135	ADORA2A
23	ko:K04268	hsa:140	ADORA3
24	ko:K04136	hsa:147	ADRA1B
25	ko:K04138	hsa:150	ADRA2A
26	ko:K04153	hsa:3350	ADRB2
27	ko:K01756	hsa:158	ADSL
28	ko:K15194	hsa:2334	AFF2
29	ko:K15185	hsa:27125	AFF4
30	ko:K12491	hsa:116987	AGAP1
31	NA	hsa:100874313	AGBL4
32	ko:K15537	hsa:392636	AGMO
33	ko:K06265	hsa:1605	AGRN
34	ko:K05231	hsa:181	AGRP
35	ko:K04167	hsa:186	AGTR2
36	ko:K16740	hsa:54806	AHI1
37	ko:K00129	hsa:220	ALDH1A3
38	ko:K00129	hsa:218	ALDH3A1
39	ko:K00139	hsa:7915	ALDH5A1
40	ko:K01623	hsa:226	ALDOA
41	NA	hsa:241	ALOX5AP
42	ko:K01490	hsa:270	AMPD1
43	NA	hsa:57188	AMT
44	ko:K09680	hsa:80025	ANK2
45	ko:K15009	hsa:85358	ANK3
46	NA	hsa:29123	ANKRD11
47	ko:K17095	hsa:311	ANXA1
48	ko:K11182	hsa:26	AOC1
49	ko:K12394	hsa:8905	AP1S2
50	ko:K02084	hsa:317	APAF1
51	NA	hsa:321	APBA2
52	NA	hsa:23637	APC
53	ko:K06172	hsa:51107	APH1A
54	ko:K04550	hsa:4035	APOE
55	NA	hsa:101929886	APP
56	NA	hsa:440034	AR
57	NA	hsa:101928337	ARC
58	NA	hsa:89839	ARHGAP11B
59	NA	hsa:55843	ARHGAP15
60	NA	hsa:83478	ARHGAP24
61	ko:K13710	hsa:8874	ARHGEF7
62	ko:K11446	hsa:10765	ARID1B
63	ko:K15589	hsa:9915	ARNT2
64	NA	hsa:101928040	ARX
65	ko:K06101	hsa:55870	ASH1L
66	ko:K00543	hsa:438	ASMT
67	NA	hsa:102724641	ASPA
68	NA	hsa:6651	ASS1
69	NA	hsa:460	ASTN1
70	NA	hsa:100128505	ASTN2
71	ko:K11471	hsa:80816	ASXL3
72	ko:K08337	hsa:10533	ATG7
73	ko:K01530	hsa:57194	ATP10A
74	NA	hsa:100874325	ATP2B2
75	NA	hsa:442211	ATP6V0C
76	NA	hsa:26033	ATRNL1
77	ko:K10779	hsa:546	ATRX
78	NA	hsa:6310	ATXN1
79	ko:K11318	hsa:6314	ATXN7
80	ko:K07380	hsa:26047	AUTS1
81	NA	hsa:26053	AUTS2
82	NA	hsa:401105	AVP
83	ko:K04226	hsa:552	AVPR1A
84	ko:K04227	hsa:553	AVPR1B
85	NA	hsa:80115	BAIAP2
86	ko:K16531	hsa:585	BBS4
87	ko:K00905	hsa:10295	BCKDK
88	NA	hsa:53335	BCL11A
89	ko:K15485	hsa:23786	BCL2
90	ko:K04355	hsa:627	BDNF
91	ko:K00544	hsa:635	BHMT
92	NA	hsa:274	BIN1
93	NA	hsa:342897	BRAF
94	ko:K10897	hsa:79728	BRCA2
95	ko:K08871	hsa:6046	BRD2
96	ko:K15192	hsa:9044	BTAF1
97	NA	hsa:100506779	BZRAP1
98	NA	hsa:113246	C12orf57
99	NA	hsa:145645	C15orf43
100	NA	hsa:205428	C3orf58
101	ko:K04011	hsa:1378	C4B
102	ko:K04344	hsa:773	CA6
103	ko:K04849	hsa:774	CACNA1B
104	NA	hsa:100874369	CACNA1C
105	ko:K04851	hsa:776	CACNA1D
106	ko:K04853	hsa:778	CACNA1F
107	ko:K04854	hsa:8913	CACNA1G
108	ko:K04855	hsa:8912	CACNA1H
109	ko:K04856	hsa:8911	CACNA1I
110	ko:K04860	hsa:55799	CACNA2D3
111	ko:K04863	hsa:783	CACNB2
112	ko:K06781	hsa:23705	CADM1
113	NA	hsa:93664	CADPS2
114	ko:K04577	hsa:10203	CALCRL
115	ko:K02183	hsa:801	CALM1
116	ko:K04515	hsa:816	CAMK2B
117	ko:K05869	hsa:814	CAMK4
118	ko:K17493	hsa:23271	CAMSAP2
119	NA	hsa:23261	CAMTA1
120	ko:K18743	hsa:4076	CAPRIN1
121	ko:K18744	hsa:65981	CAPRIN2
122	NA	hsa:9607	CARTPT
123	NA	hsa:113201	CASC4
124	ko:K06103	hsa:8573	CASK
125	ko:K02187	hsa:836	CASP3
126	ko:K04399	hsa:842	CASP9
127	ko:K16302	hsa:26504	CBS
128	ko:K18260	hsa:54862	CC2D1A
129	NA	hsa:130940	CCDC148
130	ko:K16756	hsa:92558	CCDC64
131	ko:K04194	hsa:886	CCK
132	ko:K05511	hsa:6368	CCL2
133	ko:K12499	hsa:6352	CCL5
134	ko:K01242	hsa:952	CD38
135	ko:K03161	hsa:959	CD40LG
136	ko:K06256	hsa:960	CD44
137	NA	hsa:83692	CD99L2
138	ko:K16307	hsa:9578	CDC42BPB
139	ko:K16499	hsa:57575	CDH10
140	ko:K16498	hsa:27328	CDH11
141	ko:K06812	hsa:64405	CDH22
142	ko:K16499	hsa:5100	CDH8
143	NA	hsa:100874087	CDH9
144	NA	hsa:101928038	CDK5
145	ko:K08824	hsa:344387	CDKL4
146	ko:K08824	hsa:6792	CDKL5
147	ko:K06624	hsa:1027	CDKN1B
148	NA	hsa:27443	CECR2
149	ko:K13207	hsa:56853	CELF4
150	ko:K13207	hsa:60677	CELF6
151	ko:K16533	hsa:80184	CEP290
152	ko:K16455	hsa:95681	CEP41
153	ko:K17499	hsa:5496	CGA
154	ko:K11367	hsa:1106	CHD2
155	ko:K14437	hsa:55636	CHD7
156	ko:K04494	hsa:57680	CHD8
157	ko:K12192	hsa:25978	CHMP2B
158	NA	hsa:100873984	CHRM3
159	ko:K04133	hsa:1133	CHRM5
160	ko:K04806	hsa:1137	CHRNA4
161	NA	hsa:101929970	CHRNA7
162	ko:K04814	hsa:1142	CHRNB3
163	ko:K09670	hsa:23563	CHST5
164	NA	hsa:10518	CIB2
165	NA	hsa:168741	CLOCK
166	NA	hsa:9746	CLSTN3
167	ko:K04646	hsa:8218	CLTCL1
168	NA	hsa:80790	CMIP
169	ko:K04277	hsa:1268	CNR1
170	ko:K16493	hsa:56142	CNR2
171	ko:K06761	hsa:5067	CNTN3
172	NA	hsa:100873975	CNTN4
173	ko:K06763	hsa:53942	CNTN5
174	ko:K06764	hsa:27255	CNTN6
175	ko:K07380	hsa:26047	CNTNAP2
176	NA	hsa:728577	CNTNAP3
177	NA	hsa:85445	CNTNAP4
178	NA	hsa:129684	CNTNAP5
179	ko:K18623	hsa:23242	COBL
180	ko:K06236	hsa:1301	COL11A1
181	ko:K00545	hsa:1312	COMT
182	ko:K06127	hsa:84274	COQ5
183	ko:K01298	hsa:1358	CPA2
184	ko:K15294	hsa:10814	CPLX2
185	ko:K04498	hsa:1387	CREBBP
186	ko:K04438	hsa:1398	CRK
187	ko:K04438	hsa:1399	CRKL
188	NA	hsa:643332	CRP
189	NA	hsa:7812	CSDE1
190	ko:K17495	hsa:64478	CSMD1
191	ko:K08959	hsa:1453	CSNK1D
192	ko:K08960	hsa:1454	CSNK1E
193	ko:K17494	hsa:80034	CSRNP3
194	NA	hsa:140690	CTCF
195	ko:K05691	hsa:29119	CTNNA3
196	NA	hsa:84668	CTNNB1
197	ko:K12315	hsa:72	CTSG
198	NA	hsa:55917	CTTNBP2
199	ko:K03869	hsa:8452	CUL3
200	ko:K09313	hsa:23316	CUX2
201	ko:K04192	hsa:1524	CX3CR1
202	ko:K10030	hsa:3576	CXCL8
203	ko:K04188	hsa:2833	CXCR3
204	ko:K05749	hsa:23191	CYFIP1
205	ko:K00498	hsa:1583	CYP11A1
206	ko:K00497	hsa:1584	CYP11B1
207	ko:K00512	hsa:1586	CYP17A1
208	ko:K07434	hsa:1588	CYP19A1
209	ko:K07408	hsa:1543	CYP1A1
210	NA	hsa:285154	CYP1B1
211	ko:K00513	hsa:1589	CYP21A2
212	ko:K17712	hsa:1565	CYP2D6
213	ko:K17691	hsa:100861540	CYP3A
214	ko:K00489	hsa:1581	CYP7A1
215	NA	hsa:1600	DAB1
216	ko:K13806	hsa:747	DAGLA
217	ko:K00273	hsa:1610	DAO
218	NA	hsa:267012	DAOA
219	ko:K08803	hsa:1612	DAPK1
220	ko:K12229	hsa:27071	DAPP1
221	ko:K00503	hsa:1621	DBH
222	ko:K08805	hsa:166614	DCLK2
223	ko:K10424	hsa:10540	DCTN5
224	ko:K17822	hsa:54165	DCUN1D1
225	ko:K16579	hsa:1641	DCX
226	NA	hsa:100653515	DDC
227	NA	hsa:100506660	DDX11
228	NA	hsa:168400	DDX53
229	NA	hsa:10522	DEAF1
230	NA	hsa:9681	DEPDC5
231	NA	hsa:9993	DGCR2
232	NA	hsa:102724770	DGCR6
233	ko:K00213	hsa:1717	DHCR7
234	ko:K05745	hsa:81624	DIAPH3
235	NA	hsa:100862692	DIP2A
236	ko:K16534	hsa:27185	DISC1
237	ko:K12075	hsa:1740	DLG2
238	ko:K12075	hsa:1741	DLG3
239	ko:K06094	hsa:3996	DLG4
240	NA	hsa:9228	DLGAP2
241	NA	hsa:58512	DLGAP3
242	ko:K09314	hsa:1745	DLX1
243	ko:K18488	hsa:1746	DLX2
244	ko:K09314	hsa:1750	DLX6
245	ko:K10249	hsa:6785	DMD
246	ko:K08788	hsa:1760	DMPK
247	ko:K09539	hsa:131118	DNAJC19
248	NA	hsa:92737	DNER
249	ko:K01528	hsa:1759	DNM1
250	ko:K17065	hsa:10059	DNM1L
251	NA	hsa:8448	DOC2A
252	NA	hsa:55619	DOCK10
253	ko:K05727	hsa:1795	DOCK3
254	NA	hsa:100506413	DOCK4
255	ko:K00902	hsa:22845	DOLK
256	NA	hsa:57628	DPP10
257	NA	hsa:1804	DPP6
258	NA	hsa:100873932	DPYD
259	ko:K18409	hsa:101929327	DRD1
260	ko:K18402	hsa:51105	DRD2
261	ko:K04146	hsa:1814	DRD3
262	ko:K04147	hsa:1815	DRD4
263	ko:K05840	hsa:1816	DRD5
264	ko:K12199	hsa:51534	DRG1
265	NA	hsa:1821	DRP2
266	NA	hsa:100874326	DSCAM
267	ko:K02579	hsa:64579	DST
268	NA	hsa:84062	DTNBP1
269	ko:K14165	hsa:56940	DUSP22
270	NA	hsa:143241	DYDC1
271	NA	hsa:84332	DYDC2
272	ko:K08825	hsa:1859	DYRK1A
273	NA	hsa:100533483	DYX1C1
274	ko:K03231	hsa:1917	EEF1A2
275	NA	hsa:23167	EFR3A
276	NA	hsa:100996369	EGF
277	ko:K12496	hsa:1959	EGR2
278	NA	hsa:643210	EHMT1
279	ko:K03236	hsa:9086	EIF1AY
280	ko:K18728	hsa:56478	EIF4E
281	ko:K18644	hsa:1979	EIF4EBP2
282	ko:K12641	hsa:4000	EMD
283	ko:K14363	hsa:340205	EML1
284	ko:K09073	hsa:256297	EN2
285	ko:K01689	hsa:2026	ENO2
286	NA	hsa:101927279	EP300
287	ko:K11320	hsa:57634	EP400
288	ko:K11322	hsa:26122	EPC2
289	ko:K05107	hsa:285220	EPHA6
290	ko:K05111	hsa:2048	EPHB2
291	ko:K05114	hsa:2051	EPHB6
292	ko:K17277	hsa:64787	EPS8
293	ko:K05085	hsa:2066	ERBB4
294	NA	hsa:100996511	ERG
295	ko:K08550	hsa:2099	ESR1
296	ko:K08551	hsa:2100	ESR2
297	ko:K04638	hsa:55081	ESRRB
298	ko:K03521	hsa:2109	ETFB
299	NA	hsa:23233	EXOC6B
300	ko:K02366	hsa:2131	EXT1
301	ko:K03917	hsa:2162	F13A1
302	ko:K08752	hsa:2170	FABP3
303	ko:K08754	hsa:2171	FABP5
304	ko:K08756	hsa:2173	FABP7
305	NA	hsa:54954	FAM120C
306	NA	hsa:51059	FAM135B
307	NA	hsa:131583	FAM43A
308	ko:K15363	hsa:22909	FAN1
309	NA	hsa:79072	FASTK
310	ko:K00820	hsa:2673	FAT1
311	ko:K10298	hsa:201456	FBXO15
312	ko:K10310	hsa:254170	FBXO33
313	ko:K10315	hsa:51725	FBXO40
314	ko:K06468	hsa:2208	FCER2
315	NA	hsa:100288842	FER
316	NA	hsa:154860	FEZF1
317	NA	hsa:55079	FEZF2
318	ko:K12488	hsa:50807	FGA
319	ko:K05720	hsa:2245	FGD1
320	NA	hsa:143282	FGFBP3
321	ko:K01522	hsa:2272	FHIT
322	NA	hsa:63979	FIGNL1
323	ko:K05096	hsa:2321	FLT1
324	ko:K10367	hsa:342184	FMN1
325	NA	hsa:114793	FMNL2
326	NA	hsa:100126270	FMR1
327	ko:K14592	hsa:2346	FOLH1
328	ko:K13649	hsa:2350	FOLR2
329	ko:K09029	hsa:2354	FOSB
330	ko:K09385	hsa:2290	FOXG1
331	ko:K07201	hsa:2308	FOXO1
332	NA	hsa:27086	FOXP1
333	ko:K09409	hsa:93986	FOXP2
334	ko:K15516	hsa:2332	FRAXA
335	ko:K15194	hsa:2334	FRAXE
336	NA	hsa:84548	FRAXF
337	ko:K08892	hsa:2444	FRK
338	NA	hsa:9758	FRMPD4
339	ko:K05250	hsa:2488	FSHB
340	ko:K05703	hsa:2534	FYN
341	ko:K04615	hsa:9568	GABBR2
342	ko:K05175	hsa:2554	GABRA1
343	ko:K05175	hsa:2555	GABRA2
344	ko:K05175	hsa:2556	GABRA3
345	ko:K05175	hsa:2557	GABRA4
346	ko:K05175	hsa:2558	GABRA5
347	ko:K05175	hsa:2559	GABRA6
348	ko:K05181	hsa:2560	GABRB1
349	ko:K05181	hsa:2562	GABRB3
350	ko:K05184	hsa:2563	GABRD
351	ko:K05186	hsa:2565	GABRG1
352	NA	hsa:101928869	GABRG3
353	ko:K05192	hsa:55879	GABRQ
354	ko:K01580	hsa:2571	GAD1
355	ko:K01580	hsa:2572	GAD2
356	ko:K00710	hsa:114805	GALNT13
357	ko:K00710	hsa:79623	GALNT14
358	NA	hsa:102723996	GAN
359	NA	hsa:2596	GAP43
360	NA	hsa:340508	GAS2
361	NA	hsa:101927167	GATA2
362	ko:K00613	hsa:2628	GATM
363	ko:K01495	hsa:2643	GCH1
364	NA	hsa:2644	GCHFR
365	ko:K00742	hsa:2651	GCNT2
366	ko:K05640	hsa:2670	GFAP
367	NA	hsa:100126793	GHRL
368	ko:K04284	hsa:2693	GHSR
369	ko:K18730	hsa:64599	GIGYF1
370	ko:K01759	hsa:2739	GLO1
371	ko:K05194	hsa:2742	GLRA2
372	NA	hsa:10539	GLRX3
373	ko:K00364	hsa:2766	GMPR
374	NA	hsa:101927422	GNA14
375	NA	hsa:149775	GNAS
376	NA	hsa:54584	GNB1L
377	ko:K08112	hsa:10082	GPC6
378	ko:K00111	hsa:2820	GPD2
379	ko:K15376	hsa:10243	GPHN
380	ko:K08428	hsa:124274	GPR139
381	ko:K04243	hsa:2861	GPR37
382	ko:K00432	hsa:2876	GPX1
383	ko:K05199	hsa:2892	GRIA3
384	NA	hsa:100507470	GRID1
385	ko:K05207	hsa:2895	GRID2
386	ko:K05202	hsa:2898	GRIK2
387	ko:K05203	hsa:2899	GRIK3
388	NA	hsa:114787	GRIN1
389	ko:K05209	hsa:2903	GRIN2A
390	ko:K05210	hsa:2904	GRIN2B
391	ko:K16550	hsa:23322	GRIP1
392	ko:K04603	hsa:2911	GRM1
393	ko:K04607	hsa:2914	GRM4
394	ko:K04604	hsa:2915	GRM5
395	NA	hsa:101927347	GRM7
396	ko:K04608	hsa:2918	GRM8
397	ko:K04169	hsa:2925	GRPR
398	ko:K03083	hsa:2932	GSK3B
399	NA	hsa:57000	GSN
400	ko:K00799	hsa:2944	GSTM1
401	ko:K00799	hsa:2950	GSTP1
402	NA	hsa:729156	GTF2I
403	ko:K12318	hsa:2977	GUCY1A2
404	ko:K11251	hsa:55506	H2AFY
405	NA	hsa:54985	HCFC1
406	ko:K04954	hsa:348980	HCN1
407	ko:K04239	hsa:3062	HCRT
408	ko:K04238	hsa:3061	HCRTR1
409	ko:K04239	hsa:3062	HCRTR2
410	ko:K11406	hsa:9759	HDAC4
411	ko:K11407	hsa:10013	HDAC6
412	NA	hsa:253012	HEPACAM
413	NA	hsa:102725313	HERC2
414	NA	hsa:8209	HES1
415	ko:K09087	hsa:55502	HES6
416	ko:K06847	hsa:148738	HFE
417	ko:K09631	hsa:3083	HGF
418	NA	hsa:8479	HIRIP3
419	ko:K06751	hsa:3105	HLA-A
420	ko:K06751	hsa:3106	HLA-B
421	ko:K06752	hsa:3123	HLA-DRB1
422	ko:K11299	hsa:3150	HMGN1
423	ko:K12898	hsa:3188	HNRNPH2
424	ko:K15010	hsa:9456	HOMER1
425	NA	hsa:100534589	HOXA1
426	NA		HOXB@
427	NA	hsa:10481	HOXB1
428	NA		HOXD@
429	ko:K09296	hsa:3237	HOXD11
430	ko:K09297	hsa:3238	HOXD12
431	ko:K09298	hsa:3239	HOXD13
432	ko:K10028	hsa:391322	HR
433	ko:K02833	hsa:3265	HRAS
434	ko:K08104	hsa:222537	HS3ST5
435	NA	hsa:374875	HSD11B1
436	ko:K08683	hsa:3028	HSD17B10
437	ko:K13368	hsa:3294	HSD17B2
438	ko:K10207	hsa:3293	HSD17B3
439	ko:K12405	hsa:3295	HSD17B4
440	ko:K04153	hsa:3350	HTR1A
441	ko:K04153	hsa:3351	HTR1B
442	ko:K04153	hsa:3352	HTR1D
443	ko:K04153	hsa:3354	HTR1E
444	NA	hsa:100874082	HTR2A
445	ko:K04157	hsa:3358	HTR2C
446	ko:K04819	hsa:3359	HTR3A
447	ko:K04819	hsa:9177	HTR3B
448	ko:K04819	hsa:170572	HTR3C
449	ko:K04161	hsa:3361	HTR5A
450	ko:K04162	hsa:3362	HTR6
451	NA	hsa:93164	HTR7
452	ko:K10592	hsa:10075	HUWE1
453	ko:K17570	hsa:54768	HYDIN
454	NA	hsa:130026	ICA1
455	NA	hsa:3428	IFI16
456	ko:K05087	hsa:3480	IGF1
457	NA	hsa:51214	IGF2
458	ko:K05444	hsa:11009	IL10
459	ko:K04387	hsa:7850	IL1R2
460	ko:K05170	hsa:11141	IL1RAPL1
461	ko:K05170	hsa:26280	IL1RAPL2
462	ko:K05481	hsa:3557	IL1RN
463	ko:K05434	hsa:59067	IL2
464	ko:K05430	hsa:3565	IL4
465	ko:K04738	hsa:1439	IL5
466	ko:K05055	hsa:3570	IL6
467	ko:K09648	hsa:83943	IMMP2L
468	ko:K06092	hsa:10207	INADL
469	ko:K11319	hsa:54556	ING3
470	ko:K01107	hsa:3628	INPP1
471	NA	hsa:100128164	INS
472	NA	hsa:3638	INSIG1
473	ko:K18755	hsa:10526	IPO8
474	ko:K12495	hsa:23096	IQSEC2
475	ko:K06585	hsa:3680	ITGA4
476	ko:K11510	hsa:23421	ITGB3
477	ko:K05689hsa:3695	hsa:3695	ITGB7
478	ko:K04958	hsa:3708	ITPR1
479	NA	hsa:643332	IV
480	NA	hsa:152789	JAKMIP1
481	NA	hsa:100506681	JARID2
482	ko:K11449	hsa:221037	JMJD1C
483	NA	hsa:23189	KANK1
484	ko:K07767	hsa:83473	KATNAL2
485	ko:K04892	hsa:3751	KCND2
486	ko:K05003	hsa:3766	KCNJ10
487	ko:K04996	hsa:3759	KCNJ2
488	ko:K04997	hsa:3760	KCNJ3
489	ko:K04919	hsa:51305	KCNK9
490	NA	hsa:101929328	KCNMA1
491	ko:K04944	hsa:3782	KCNN3
492	ko:K04927	hsa:3785	KCNQ2
493	ko:K04928	hsa:3786	KCNQ3
494	ko:K04930	hsa:56479	KCNQ5
495	ko:K04946	hsa:57582	KCNT1
496	ko:K15074	hsa:253980	KCTD13
497	ko:K11446	hsa:10765	KDM5B
498	NA	hsa:102723508	KDM5C
499	ko:K11448	hsa:23135	KDM6B
500	ko:K17843	hsa:202559	KHDRBS2
501	NA	hsa:79932	KIAA0319L
502	NA	hsa:23078	VWA8
503	NA	hsa:57691	KIAA1586
504	NA	hsa:340533	KIAA2022
505	ko:K10396	hsa:3800	KIF5C
506	ko:K07982	hsa:3806	KIR2DS1
507	ko:K07982	hsa:3809	KIR2DS4
508	ko:K07982	hsa:3810	KIR2DS5
509	NA	hsa:3813	KIR3DS1
510	ko:K05461	hsa:4254	KIT
511	ko:K10407	hsa:147700	KLC2
512	ko:K00486	hsa:8564	KMO
513	ko:K09188	hsa:58508	KMT2C
514	ko:K09189	hsa:55904	KMT2E
515	NA	hsa:11133	KPTN
516	ko:K07605	hsa:3891	KRT8
517	ko:K06550	hsa:3897	L1CAM
518	ko:K05637	hsa:284217	LAMA1
519	ko:K05636hsa:3912	hsa:3912	LAMB1
520	ko:K06245	hsa:22798	LAMB4
521	ko:K06247	hsa:10319	LAMC3
522	NA	hsa:3927	LASP1
523	NA	hsa:101929152	LEP
524	NA	hsa:101929152	LEPR
525	NA	hsa:391723	LHB
526	ko:K04248	hsa:3973	LHCGR
527	NA	hsa:645591	LHFPL3
528	NA	hsa:64130	LIN7B
529	ko:K09371	hsa:4010	LMX1B
530	ko:K16358	hsa:145581	LRFN5
531	ko:K06233	hsa:4036	LRP2
532	NA	hsa:7804	LRP8
533	ko:K17964	hsa:10128	LRPPRC
534	NA	hsa:55604	LRRC1
535	NA	hsa:101180901	LRRC7
536	NA	hsa:57633	LRRN1
537	NA	hsa:54674	LRRN3
538	NA	hsa:84445	LZTS2
539	NA	hsa:140733	MACROD2
540	ko:K12464	hsa:9500	MAGED1
541	NA	hsa:54551	MAGEL2
542	ko:K00274	hsa:4128	MAOA
543	ko:K00274	hsa:4129	MAOB
544	ko:K04431	hsa:5609	MAP2
545	ko:K04368	hsa:5604	MAP2K1
546	ko:K04369	hsa:5605	MAP2K2
547	ko:K04466	hsa:9020	MAP3K14
548	ko:K04371	hsa:5594	MAPK1
549	ko:K04371	hsa:5595	MAPK3
550	ko:K04435	hsa:23542	MAPK8IP2
551	ko:K04380	hsa:4137	MAPT
552	ko:K08798	hsa:4139	MARK1
553	ko:K06842	hsa:10501	MAZ
554	ko:K14617	hsa:55788	MBD1
555	ko:K11591	hsa:53615	MBD3
556	ko:K10801	hsa:8930	MBD4
557	NA	hsa:55777	MBD5
558	NA	hsa:114785	MBD6
559	ko:K17591	hsa:23504	MBP
560	ko:K04201	hsa:4159	MC3R
561	ko:K04202	hsa:4160	MC4R
562	NA	hsa:57458	MCC
563	ko:K04320	hsa:2847	MCHR1
564	ko:K02210	hsa:4176	MCM7
565	ko:K11456	hsa:1911	MCPH1
566	NA	hsa:161357	MDGA2
567	ko:K11588	hsa:4204	MECP2
568	ko:K15162	hsa:116931	MED12
569	ko:K15164	hsa:23389	MED13L
570	NA	hsa:101929423	MEF2C
571	NA	hsa:729458	MET
572	NA	hsa:162387	MFSD6
573	ko:K10645	hsa:57534	MIB1
574	NA	hsa:400765	MIR137
575	ko:K16979	hsa:407001	MIR21
576	NA	hsa:100422840	MIR431
577	ko:K08805	hsa:166614	MKL2
578	ko:K15687	hsa:7681	MKRN3
579	ko:K13822	hsa:3039	MOG
580	NA	hsa:100874190	MSN
581	ko:K06558	hsa:4481	MSR1
582	ko:K10266	hsa:374286	MT1A
583	NA	hsa:9988	MTF1
584	ko:K00297	hsa:4524	MTHFR
585	ko:K04285	hsa:4543	MTNR1A
586	ko:K04286	hsa:4544	MTNR1B
587	NA	hsa:54332	MTR
588	ko:K00597	hsa:4552	MTRR
589	ko:K17776	hsa:10651	MTX2
590	ko:K17298	hsa:56667	MUC1
591	ko:K10352	hsa:4622	MYH4
592	ko:K10637	hsa:29116	MYLIP
593	NA	hsa:100885782	MYO16
594	ko:K10356	hsa:4640	MYO1A
595	ko:K10356	hsa:4642	MYO1D
596	ko:K10360	hsa:4650	MYO9B
597	NA	hsa:730811	MYT1L
598	ko:K00670	hsa:80155	NAA15
599	NA	hsa:26960	NBEA
600	ko:K05750	hsa:10787	NCKAP1
601	NA	hsa:344148	NCKAP5
602	NA	hsa:57701	NCKAP5L
603	NA	hsa:57727	NCOA5
604	ko:K16739	hsa:81565	NDEL1
605	NA	hsa:54551	NDN
606	NA	hsa:56160	NDNL2
607	ko:K03949	hsa:4698	NDUFA5
608	ko:K03962	hsa:4712	NDUFB6
609	ko:K13305	hsa:23327	NEDD4
610	ko:K04572	hsa:4747	NEFL
611	NA	hsa:4745	NELL1
612	ko:K09081	hsa:4762	NEUROG1
613	ko:K09228	hsa:163071	NF1
614	NA	hsa:100996570	NFIA
615	ko:K09059	hsa:4783	NFIL3
616	ko:K04465	hsa:3164	NGF
617	ko:K02583	hsa:4804	NGFR
618	ko:K10602	hsa:378884	NHLRC1
619	ko:K19364	hsa:123606	NIPA1
620	NA	hsa:81614	NIPA2
621	ko:K06672	hsa:25836	NIPBL
622	ko:K09345	hsa:1482	NKX2-5
623	NA	hsa:100874010	NLGN1
624	ko:K07378	hsa:57555	NLGN2
625	ko:K07378	hsa:54413	NLGN3
626	ko:K07378	hsa:57502	NLGN4X
627	NA	hsa:100874056	NLGN4Y
628	ko:K12800	hsa:114548	NLRP3
629	ko:K13240	hsa:4842	NOS1
630	ko:K16513	hsa:9722	NOS1AP
631	ko:K13241	hsa:4843	NOS2
632	NA	hsa:115677	NOSTRIN
633	ko:K09026	hsa:4862	NPAS2
634	NA	hsa:4885	NPTX2
635	ko:K04206	hsa:5540	NPY
636	ko:K04204	hsa:4886	NPY1R
637	ko:K04205	hsa:4887	NPY2R
638	ko:K04207	hsa:4889	NPY5R
639	ko:K08545	hsa:7101	NR2E1
640	ko:K08555	hsa:4306	NR3C2
641	ko:K08558	hsa:4929	NR4A2
642	NA	hsa:102060282	NRAS
643	ko:K06757	hsa:23114	NRCAM
644	ko:K05455	hsa:3084	NRG1
645	ko:K06819	hsa:8828	NRP2
646	ko:K07377	hsa:9378	NRXN1
647	ko:K07377	hsa:9379	NRXN2
648	ko:K07377	hsa:9369	NRXN3
649	ko:K15588	hsa:64324	NSD1
650	NA	hsa:100288842	NSF
651	ko:K04356	hsa:4908	NTF3
652	ko:K12457	hsa:4909	NTF4
653	ko:K07522	hsa:22854	NTNG1
654	ko:K03176	hsa:4914	NTRK1
655	ko:K04360	hsa:4915	NTRK2
656	NA	hsa:283738	NTRK3
657	ko:K14284	hsa:55998	NXF5
658	ko:K16656	hsa:30010	NXPH1
659	NA	hsa:4948	OCA2
660	NA	hsa:284451	ODF3L2
661	ko:K18134	hsa:285203	OGT
662	ko:K04981	hsa:140803	OMG
663	NA	hsa:4983	OPHN1
664	ko:K04213	hsa:4985	OPRD1
665	ko:K04214	hsa:4986	OPRK1
666	ko:K04216	hsa:4987	OPRL1
667	ko:K04215	hsa:4988	OPRM1
668	ko:K04257	hsa:26188	OR1C1
669	NA	hsa:114880	OSBPL6
670	ko:K09326	hsa:5013	OTX1
671	ko:K05243	hsa:5020	OXT
672	ko:K04229	hsa:5021	OXTR
673	ko:K05218	hsa:5025	P2RX4
674	ko:K16794	hsa:5048	PAFAH1B1
675	ko:K00500	hsa:5053	PAH
676	ko:K03443	hsa:24145	PANX1
677	ko:K03443	hsa:56666	PANX2
678	NA	hsa:117583	PARD3B
679	ko:K04556	hsa:5071	PARK2
680	ko:K08956	hsa:10939	PAX5
681	ko:K08031	hsa:5080	PAX6
682	ko:K01724	hsa:5092	PCBD1
683	ko:K16499	hsa:57575	PCDH10
684	ko:K16500	hsa:65217	PCDH15
685	ko:K16499	hsa:57575	PCDH19
686	ko:K16499	hsa:5100	PCDH8
687	NA	hsa:100874087	PCDH9
688	NA		PCDHA@
689	ko:K16493	hsa:56137	PCDHA1
690	ko:K16493	hsa:56139	PCDHA10
691	ko:K16493	hsa:56138	PCDHA11
692	ko:K16493	hsa:56137	PCDHA12
693	ko:K16493	hsa:56136	PCDHA13
694	ko:K16493	hsa:56146	PCDHA2
695	ko:K16493	hsa:56145	PCDHA3
696	ko:K16493	hsa:56144	PCDHA4
697	ko:K16493	hsa:56143	PCDHA5
698	ko:K16493	hsa:56142	PCDHA6
699	ko:K16493	hsa:56141	PCDHA7
700	ko:K16493	hsa:56140	PCDHA8
701	ko:K16493	hsa:9752	PCDHA9
702	ko:K16493	hsa:56135	PCDHAC1
703	ko:K16493	hsa:56134	PCDHAC2
704	ko:K16495	hsa:56105	PCDHGA11
705	ko:K13755	hsa:5137	PDE1C
706	ko:K13293	hsa:5141	PDE4A
707	ko:K13293	hsa:5142	PDE4B
708	ko:K15682	hsa:57595	PDZD4
709	NA	hsa:5174	PDZK1
710	ko:K07753	hsa:55825	PECR
711	ko:K04246	hsa:2852	PER1
712	NA	hsa:168002	PER2
713	ko:K13341	hsa:5191	PEX7
714	ko:K08821	hsa:5218	CDK14
715	ko:K18402	hsa:51105	PHF2
716	ko:K11445	hsa:23133	PHF8
717	ko:K00922	hsa:5290	PIK3CA
718	ko:K00922	hsa:5294	PIK3CG
719	ko:K02649	hsa:5295	PIK3R1
720	ko:K02649	hsa:5296	PIK3R2
721	ko:K11135	hsa:54984	PINX1
722	ko:K09356	hsa:5307	PITX1
723	ko:K09357	hsa:5309	PITX3
724	NA	hsa:390940	PLAUR
725	ko:K05858	hsa:23236	PLCB1
726	ko:K05857	hsa:5333	PLCD1
727	NA	hsa:63924	PLD5
728	ko:K05225	hsa:8862	PLN
729	NA	hsa:91584	PLXNA4
730	NA	hsa:5368	PNOC
731	NA	hsa:23126	POGZ
732	ko:K05228	hsa:5443	POMC
733	ko:K09666	hsa:55624	POMGNT1
734	NA	hsa:10418	PON1
735	NA	hsa:440895	POR
736	NA	hsa:401398	POT1
737	ko:K09368	hsa:11281	POU6F2
738	NA	hsa:8500	PPFIA1
739	ko:K09566	hsa:9360	PPIG
740	ko:K15494	hsa:84152	PPP1R1B
741	ko:K17453	hsa:89801	PPP1R3F
742	ko:K15423	hsa:5531	PPP4C
743	ko:K04511	hsa:144165	PRICKLE1
744	NA	hsa:100874242	PRICKLE2
745	ko:K09085	hsa:10215	PRKCB
746	ko:K06070	hsa:5587	PRKD1
747	NA	hsa:7163	PRL
748	ko:K05081	hsa:5618	PRLR
749	ko:K00318	hsa:5625	PRODH
750	NA	hsa:339501	PRSS38
751	ko:K18449	hsa:158471	PRUNE2
752	ko:K12494	hsa:23362	PSD3
753	ko:K02740	hsa:5696	PSMB5
754	ko:K06694	hsa:5716	PSMD10
755	NA	hsa:139411	PTCHD1
756	NA	hsa:400927	PTEN
757	ko:K04260	hsa:5733	PTGER3
758	ko:K04263	hsa:5739	PTGIR
759	NA	hsa:103752588	PTGS2
760	ko:K05725	hsa:5747	PTK2
761	ko:K07293	hsa:5781	PTPN11
762	ko:K18018	hsa:84867	PTPN5
763	ko:K05694	hsa:5787	PTPRB
764	ko:K06478	hsa:5788	PTPRC
765	ko:K07817	hsa:5799	PTPRN2
766	ko:K13297	hsa:11122	PTPRT
767	ko:K08114	hsa:5803	PTPRZ1
768	ko:K14326	hsa:5976	PTS
769	NA	hsa:7837	PXDN
770	ko:K04207	hsa:4889	PYY
771	ko:K00357	hsa:5860	QDPR
772	ko:K12484	hsa:26056	RAB11FIP5
773	ko:K17047	hsa:401409	RAB19
774	ko:K07925	hsa:116442	RAB39B
775	ko:K04650	hsa:9611	RAC1
776	ko:K04366	hsa:5894	RAF1
777	ko:K16056	hsa:84876	RAI1
778	NA	hsa:91149	RAPGEF4
779	ko:K08527	hsa:5914	RARA
780	ko:K08528	hsa:5915	RARB
781	ko:K08529	hsa:5916	RARG
782	ko:K07843	hsa:51655	RASD1
783	ko:K04350	hsa:10125	RASGRP1
784	ko:K08015	hsa:83593	RASSF5
785	ko:K17589	hsa:9821	RB1CC1
786	ko:K14946	hsa:54715	RBFOX1
787	ko:K12876	hsa:9939	RBM8A
788	NA	hsa:100873977	RBMS3
789	ko:K17338	hsa:221035	REEP3
790	ko:K06249	hsa:5649	RELN
791	ko:K05628	hsa:473	RERE
792	ko:K13438	hsa:56729	RETN
793	ko:K10754	hsa:5981	RFC1
794	ko:K10143	hsa:64326	RFWD2
795	NA	hsa:401190	RGS7
796	NA	hsa:158800	RHOXF1
797	ko:K15291	hsa:22999	RIMS1
798	ko:K15298	hsa:9783	RIMS3
799	ko:K14325	hsa:10921	RNPS1
800	ko:K06753	hsa:6091	ROBO1
801	ko:K06754	hsa:6092	ROBO2
802	ko:K06755	hsa:64221	ROBO3
803	ko:K06784	hsa:54538	ROBO4
804	NA	hsa:101928784	RORA
805	ko:K02866	hsa:6134	RPL10
806	ko:K14525	hsa:54913	RPP25
807	NA	hsa:100861523	RPS6KA2
808	ko:K04373	hsa:6197	RPS6KA3
809	ko:K07605	hsa:112802	RS1
810	ko:K08524	hsa:6256	RXRA
811	ko:K08525	hsa:6257	RXRB
812	ko:K08526	hsa:6258	RXRG
813	ko:K04963	hsa:6263	RYR3
814	ko:K10684	hsa:10055	SAE1
815	NA	hsa:23314	SATB2
816	NA	hsa:100133234	SBF1
817	NA	hsa:152579	SCFD2
818	NA	hsa:6447	SCG5
819	ko:K04833	hsa:6323	SCN1A
820	ko:K04834	hsa:6326	SCN2A
821	ko:K04839	hsa:6332	SCN7A
822	ko:K04840	hsa:6334	SCN8A
823	ko:K15731	hsa:10106	SCP2
824	ko:K16336	hsa:6383	SDC2
825	ko:K16353	hsa:221935	SDK1
826	ko:K06841	hsa:9037	SEMA5A
827	ko:K03982	hsa:5054	SERPINE1
828	NA	hsa:26040	SETBP1
829	ko:K11423	hsa:29072	SETD2
830	NA	hsa:55209	SETD5
831	ko:K11421	hsa:9869	SETDB1
832	ko:K18494	hsa:83852	SETDB2
833	NA	hsa:26470	SEZ6L2
834	NA	hsa:113402	SFT2D1
835	ko:K01565	hsa:6448	SGSH
836	NA	hsa:27352	SGSM3
837	ko:K12470	hsa:30011	SH3KBP1
838	ko:K15009	hsa:50944	SHANK1
839	NA	hsa:100874198	SHANK2
840	ko:K15009	hsa:85358	SHANK3
841	NA	hsa:6462	SHBG
842	ko:K11988	hsa:6469	SHH
843	ko:K00600	hsa:6470	SHMT1
844	ko:K14427	hsa:9990	SLC12A6
845	ko:K14444	hsa:6561	SLC13A1
846	ko:K08180	hsa:9123	SLC16A3
847	ko:K08184	hsa:9194	SLC16A7
848	ko:K14609	hsa:6573	SLC19A1
849	ko:K05612	hsa:6505	SLC1A1
850	ko:K05614	hsa:6507	SLC1A3
851	ko:K08211	hsa:55356	SLC22A15
852	ko:K13752	hsa:123041	SLC24A2
853	ko:K15105	hsa:8604	SLC25A12
854	ko:K15105	hsa:10165	SLC25A13
855	ko:K15106	hsa:9016	SLC25A14
856	ko:K14684	hsa:29957	SLC25A24
857	ko:K15112	hsa:9481	SLC25A27
858	ko:K03323	hsa:222962	SLC29A4
859	ko:K14691	hsa:7782	SLC30A4
860	ko:K14692	hsa:64924	SLC30A5
861	ko:K15272	hsa:23443	SLC35A3
862	ko:K14996	hsa:124565	SLC38A10
863	ko:K14717	hsa:201266	SLC39A11
864	ko:K13861	hsa:57282	SLC4A10
865	NA	hsa:653562	SLC6A1
866	ko:K05038	hsa:11254	SLC6A14
867	ko:K05048	hsa:54716	SLC6A2
868	ko:K05036	hsa:6531	SLC6A3
869	ko:K05037	hsa:6532	SLC6A4
870	ko:K05039	hsa:6535	SLC6A8
871	ko:K13780	hsa:8140	SLC7A5
872	ko:K12041	hsa:84679	SLC9A6
873	ko:K14725	hsa:285195	SLC9A9
874	ko:K06838	hsa:6585	SLIT3
875	NA	hsa:26050	SLITRK5
876	ko:K11124	hsa:23293	SMG6
877	NA	hsa:283693	SMO
878	ko:K18211	hsa:6616	SNAP25
879	ko:K15979	hsa:27044	SND1
880	NA	hsa:8926	SNRPN
881	NA	hsa:54221	SNTG2
882	ko:K17930	hsa:399979	SNX19
883	ko:K04565	hsa:6647	SOD1
884	NA	hsa:114815	SORCS1
885	NA	hsa:100505890	SORCS3
886	ko:K09269	hsa:6660	SOX5
887	ko:K19367	hsa:51324	SPAST
888	NA	hsa:10418	SPON1
889	NA	hsa:101927988	SPR
890	NA	hsa:101930466	SRC
891	ko:K12343	hsa:6715	SRD5A1
892	ko:K12344	hsa:6716	SRD5A2
893	ko:K09271	hsa:6665	SRY
894	NA	hsa:63895	ST7
895	ko:K06612	hsa:8128	ST8SIA2
896	ko:K08790	hsa:11329	STK38
897	ko:K08835	hsa:27347	STK39
898	ko:K10352	hsa:4627	STS
899	ko:K04560	hsa:6804	STX1A
900	ko:K15292	hsa:6812	STXBP1
901	ko:K08518	hsa:134957	STXBP5
902	ko:K01900	hsa:8801	SUCLG2
903	ko:K11822	hsa:6822	SULT2A1
904	ko:K08593	hsa:26168	SUMO1
905	ko:K11429	hsa:51111	SUV420H1
906	NA	hsa:94056	SYAP1
907	ko:K08489	hsa:8675	SYN1
908	NA	hsa:6854	SYN2
909	NA	hsa:8224	SYN3
910	ko:K19326	hsa:23345	SYNE1
911	ko:K17631	hsa:8831	SYNGAP1
912	NA	hsa:51760	SYT17
913	NA	hsa:83850	SYT3
914	NA	hsa:440034	T
915	ko:K04222	hsa:6869	TAC1
916	ko:K15214	hsa:9013	TAF1C
917	ko:K03125	hsa:138474	TAF1L
918	ko:K04429	hsa:9344	TAOK2
919	ko:K08474	hsa:50833	TAS2R1
920	ko:K18469	hsa:9779	TBC1D5
921	NA	hsa:51256	TBC1D7
922	ko:K04508	hsa:79718	TBL1X
923	ko:K04508	hsa:79718	TBL1XR1
924	ko:K04508	hsa:90665	TBL1Y
925	ko:K04296	hsa:1241	TBR1
926	ko:K10175	hsa:6899	TBX1
927	NA	hsa:6942	TCF20
928	ko:K04491	hsa:6934	TCF4
929	ko:K04491	hsa:6934	TCF7L2
930	NA	hsa:1417	TCN2
931	ko:K00453	hsa:6999	TDO2
932	ko:K09448	hsa:7003	TEAD1
933	ko:K13097	hsa:80312	TET1
934	ko:K03909	hsa:7035	TFPI
935	NA	hsa:8848	TGFB1
936	ko:K03370	hsa:8869	TGM3
937	NA	hsa:154761	TH
938	ko:K16857	hsa:7057	THBS1
939	NA	hsa:195977	THRA
940	ko:K08864	hsa:11011	TLK2
941	NA	hsa:79853	TM4SF20
942	NA	hsa:55273	TMEM100
943	ko:K19362	hsa:79583	TMEM231
944	NA	hsa:100507404	TMLHE
945	NA	hsa:100534012	TNF
946	NA	hsa:79155	TNIP2
947	ko:K18412	hsa:23112	TNRC6B
948	ko:K17770	hsa:9804	TOMM20
949	NA	hsa:101927117	TOP1
950	ko:K03165	hsa:8940	TOP3B
951	ko:K00502	hsa:7166	TPH1
952	ko:K00502	hsa:121278	TPH2
953	ko:K05082	hsa:4352	TPO
954	NA	hsa:83696	TRAPPC9
955	ko:K10607	hsa:22954	TRIM32
956	ko:K08883	hsa:51592	TRIM33
957	NA	hsa:11078	TRIO
958	ko:K10590	hsa:9320	TRIP12
959	ko:K04969	hsa:7225	TRPC6
960	ko:K04976	hsa:4308	TRPM1
961	ko:K05222	hsa:7442	TRPV1
962	ko:K07206	hsa:7248	TSC1
963	NA	hsa:8848	TSC2
964	ko:K13814	hsa:203062	TSN
965	ko:K17355	hsa:23554	TSPAN12
966	ko:K06571	hsa:7102	TSPAN7
967	ko:K05770	hsa:706	TSPO
968	NA	hsa:80185	TTI2
969	ko:K12567	hsa:7273	TTN
970	NA	hsa:100288079	TUB
971	ko:K16572	hsa:114791	TUBGCP5
972	NA	hsa:100996571	TYR
973	ko:K13718	hsa:54726	UBA6
974	ko:K10573	hsa:7319	UBE2A
975	ko:K10576	hsa:7328	UBE2H
976	ko:K10587	hsa:7337	UBE3A
977	ko:K10588	hsa:89910	UBE3B
978	ko:K10589	hsa:9690	UBE3C
979	ko:K09578	hsa:5300	UBL5
980	NA	hsa:84993	UBL7
981	ko:K10593	hsa:51366	UBR5
982	ko:K11979	hsa:55148	UBR7
983	ko:K01431	hsa:51733	UPB1
984	ko:K14327	hsa:26019	UPF2
985	ko:K14328	hsa:65109	UPF3B
986	ko:K00757	hsa:151531	UPP2
987	ko:K14165	hsa:150290	USP18
988	ko:K11840	hsa:8239	USP9X
989	ko:K11840	hsa:8287	USP9Y
990	NA	hsa:22846	VASH1
991	ko:K05448	hsa:7422	VEGFA
992	NA	hsa:7425	VGF
993	ko:K05761	hsa:7429	VIL1
994	NA	hsa:100874007	VIP
995	NA	hsa:100874007	VIPR1
996	NA	hsa:7436	VLDLR
997	NA	hsa:157680	VPS13B
998	NA	hsa:51322	WAC
999	NA	hsa:404201	WDFY3
1000	ko:K14020	hsa:7466	WFS1
1001	ko:K08867	hsa:65267	WNK3
1002	ko:K00182	hsa:7482	WNT1
1003	ko:K00182	hsa:7482	WNT2
1004	NA	hsa:165904	XIRP1
1005	NA	hsa:100874011	XIRP2
1006	ko:K10610	hsa:1642	XPC
1007	ko:K14290	hsa:7514	XPO1
1008	NA	hsa:55689	YEATS2
1009	NA	hsa:64848	YTHDC2
1010	ko:K16197	hsa:7529	YWHAB
1011	ko:K06630	hsa:7531	YWHAE
1012	ko:K16197	hsa:7534	YWHAZ
1013	NA	hsa:79740	ZBBX
1014	ko:K10055	hsa:7704	ZBTB16
1015	NA	hsa:100874131	ZBTB20
1016	NA	hsa:10771	ZMYND11
1017	NA	hsa:7754	ZNF18
1018	NA	hsa:151126	ZNF385B
1019	NA	hsa:55628	ZNF407
1020	ko:K09228	hsa:340385	ZNF517
1021	ko:K09228	hsa:349075	ZNF713
1022	ko:K10515	hsa:29068	ZNF8
1023	NA	hsa:91752	ZNF804A
1024	NA	hsa:152485	ZNF827
1025	NA	hsa:57643	ZSWIM5
1026	ko:K14539	hsa:55341	LSG1
1027	ko:K04157	hsa:3357	HTR2B
1028	ko:K04160	hsa:3360	HTR4
1029	NA	hsa:388011	LINC01550
1030	ko:K01074	hsa:9374	PPT2
1031	ko:K00825	hsa:51166	AADAT
